# Supplementary material for: Effective Infection with Dengue Virus in Experimental Neonate and Adult Mice through the Intranasal Route
Source: MDPI journal article supplement (doi:10.3390/v14071394), 2022-06-26
Supplement: s1 [file s1]

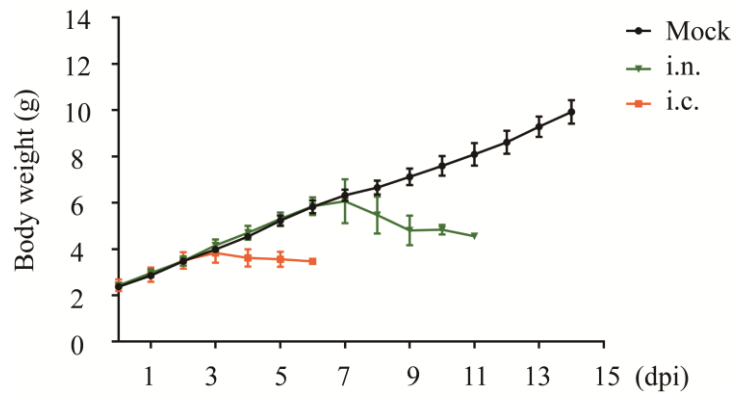

**Figure S1. Body weight of Balb/c suckling mice post virus challenge.** The data are expressed as mean  $\pm$  SD from two independent experiments (titer= $2.4 \times 10^4$  PFU, i.c., n=5; i.n., n=5; mock, n=5). Abbreviations: i.c., intracranial; i.n., intranasal; dpi, day post inoculation.

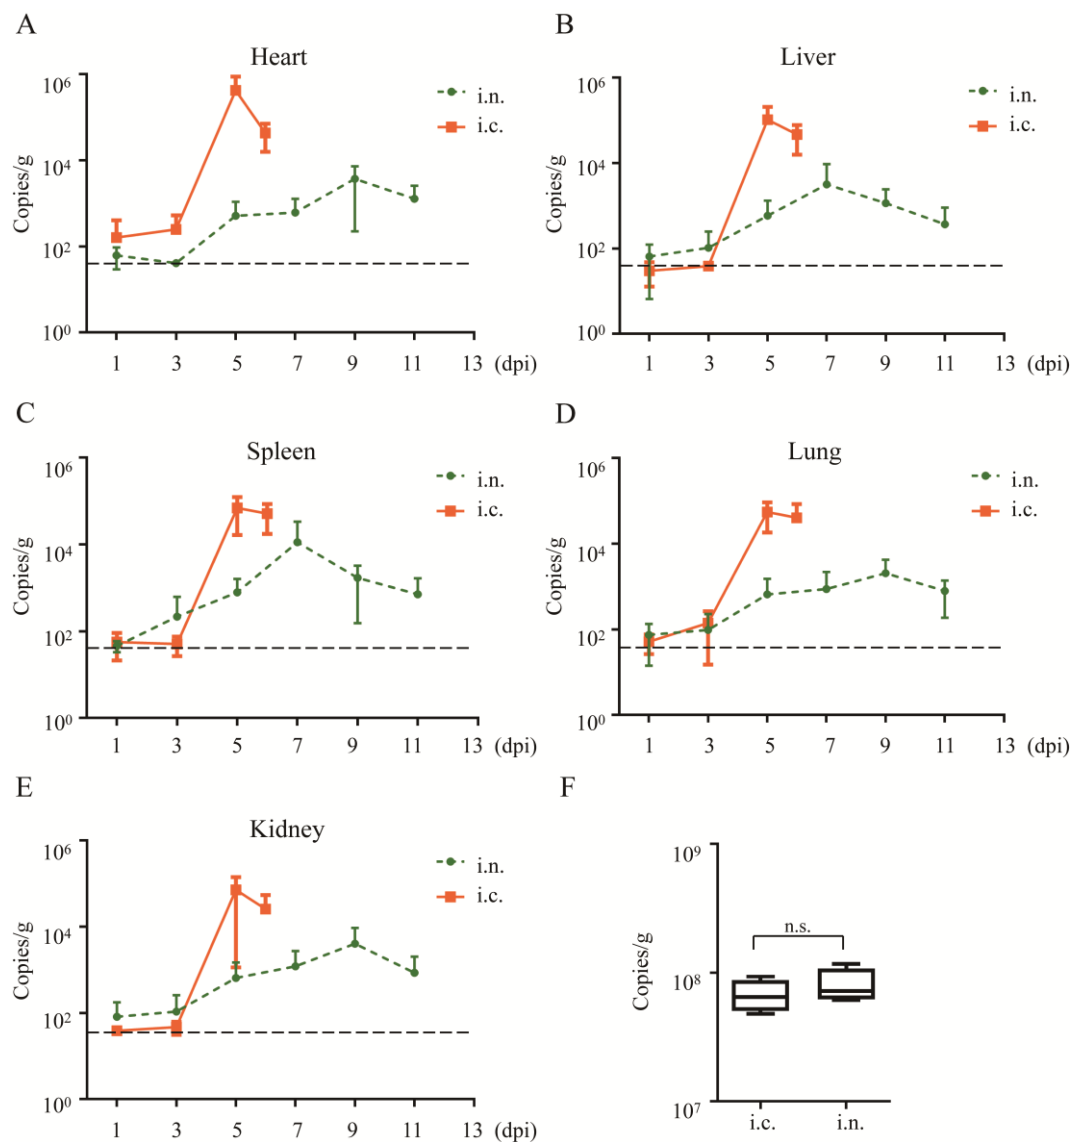

**Figure S2. Viral RNAs loads in Balb/c suckling mice tissues.** Heart (A), liver (B), spleen (C), lung (D) and kidney (E) were harvested and viral RNAs loads were determined by qRT-PCR (titer= $2.4 \times 10^4$  PFU, i.c., n=5; i.n., n=5). B. Comparison of final RNA copies in mice brain between i.n. group and i.c. group. Data are expressed as mean  $\pm$  SD. Abbreviations: i.c., intracranial; i.n., intranasal; dpi, day post inoculation.

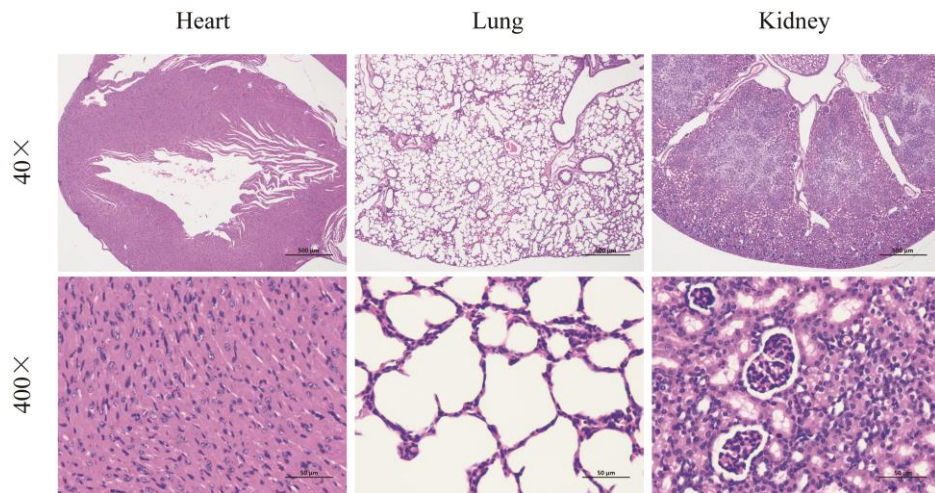

**Figure S3. Histopathological study on heart, lung and kidney.** No obvious histopathological changes were observed in these organs.

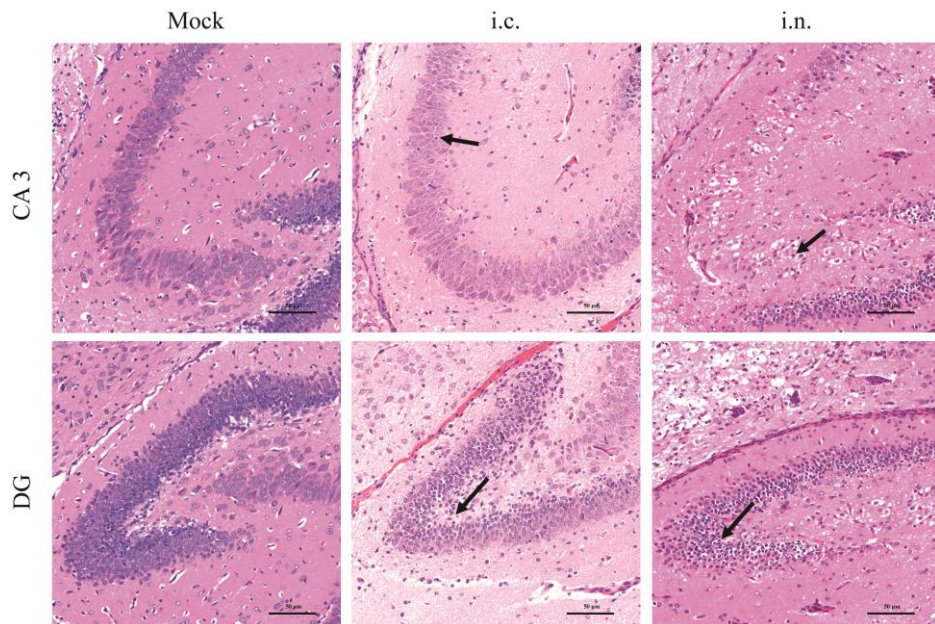

**Figure S4. Histopathological changes in hippocampal CA3 and DG area.** Brains were harvested from intracranially or intranasally challenged mice sacrificed at a late phase of illness (5 and 9 dpi, respectively) and stained with H&E. The histopathological changes on hippocampus CA3 and DG area

were observed (black arrows, necrotic pyramidal cells). Scal bar, 50  $\mu\text{m}$ . Abbreviations: i.c., intracranial; i.n., intranasal.

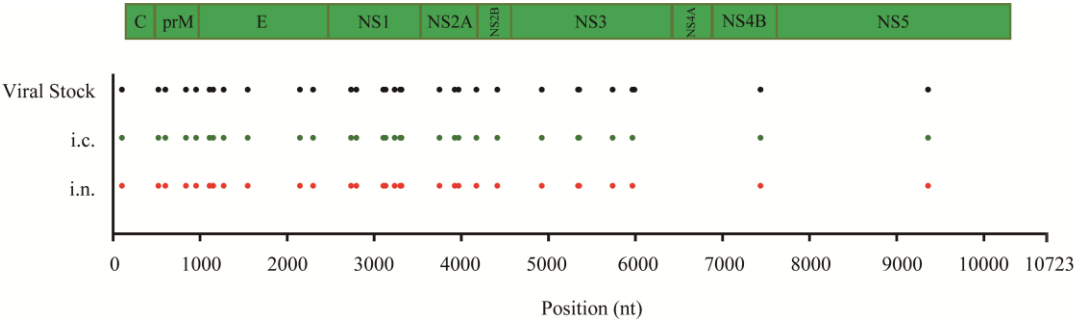

**Figure S5. Gene Mutation of DENV-2 isolates.** The genome sequences of DENV-2 isolates were analyzed by sequence alignment in the Genebank to identify the mutations. Mutation sites of each viral sample were represented as dots (black, viral stock; green, i.c.; red, i.n.). Abbreviations: i.c., intracranial; i.n., intranasal.

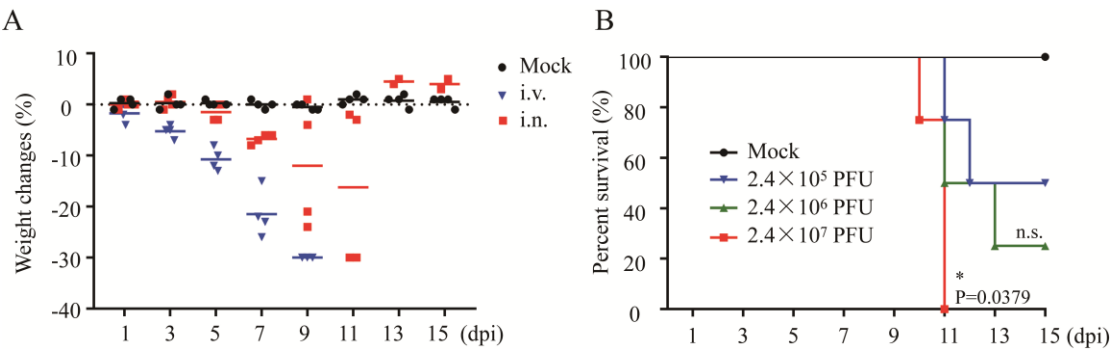

**Figure S6. Clinical phenomena of A6 mice after DENV-2 intranasal inoculation.** (A) Body weight changes of A6 mice. (B) Survival probability of DENV 2 intranasally infected A6 mice with different titers (titer= $2.4 \times 10^5$  PFU, n=4; titer= $2.4 \times 10^6$  PFU, n=4; titer= $2.4 \times 10^7$  PFU, n=4; mock, n=4). Abbreviations: i.v., intravenous; i.n., intranasal; dpi, day post inoculation. A log rank test was used to determine the statistical significance of survival compared with  $2.4 \times 10^5$  PFU group,  $P < 0.05$  indicates statistically significant differences.

**Table S1. Clinical sign of intracranially or intranasally challenged suckling mice with DENV-2 (Titer =  $2.4 \times 10^4$  PFU)**

| dpi | Clinical Sign, No./Total Observed |          |       |            |          |       |
|-----|-----------------------------------|----------|-------|------------|----------|-------|
|     | i.c.                              |          |       | i.n.       |          |       |
|     | Excitement                        | Asthenia | Death | Excitement | Asthenia | Death |
| 4   | 0/21                              | 20/21    | 0/21  | 0/20       | 0/20     | 0/20  |
| 5   | 0/21                              | 14/21    | 7/21  | 0/20       | 0/20     | 0/20  |
| 6   | 0/14                              | 6/14     | 8/14  | 2/20       | 0/20     | 0/20  |
| 7   | 0/6                               | 0/6      | 6/6   | 0/20       | 9/20     | 1/20  |
| 8   |                                   |          |       | 6/19       | 8/19     | 2/19  |
| 9   |                                   |          |       | 0/17       | 10/17    | 8/17  |
| 10  |                                   |          |       | 0/9        | 6/9      | 3/9   |
| 11  |                                   |          |       | 0/6        | 1/6      | 5/6   |
| 12  |                                   |          |       | 0/1        | 0/1      | 1/1   |

Abbreviations: i.c., intracranial; i.n., intranasal; dpi, day post inoculation.

**Table S2. Cytopathic effects in Vero cells after DENV-2 inoculation**

| Cultured Sample |           | Day post inoculation |   |   |    |     |     |      |
|-----------------|-----------|----------------------|---|---|----|-----|-----|------|
|                 |           | 1                    | 2 | 3 | 4  | 5   | 6   | 7    |
| <b>Mock</b>     | /         | -                    | - | - | -  | -   | -   | -    |
|                 | Passage 1 | -                    | - | + | ++ | +++ | +++ | ++++ |
| <b>i.c.</b>     | Passage 2 | -                    | - | - | -  | +   | ++  | +++  |
|                 | Passage 3 | -                    | - | - | +  | ++  | +++ | ++++ |
|                 | Passage 1 | -                    | - | + | ++ | +++ | +++ | ++++ |
| <b>i.n.</b>     | Passage 2 | -                    | - | - | +  | ++  | +++ | ++++ |
|                 | Passage 3 | -                    | - | + | ++ | +++ | +++ | ++++ |

Abbreviations: i.c., intracranial; i.n., intranasal.

**Table S3. Sequences of PCR primers used in this study**

| <b>Primer name</b> | <b>Sequence (5'-3')</b>  |
|--------------------|--------------------------|
| DENV-2-F           | GCAGAATGCCCCAACACAAA     |
| DENV-2-R           | ACAAAATACATCCTGCCTTTCTCT |
| IL-1 $\beta$ -M-F  | TGCCACCTTTTGACAGTGATG    |
| IL-1 $\beta$ -M-R  | TGATGTGCTGCTGCGAGATT     |
| IL-6-M-F           | ACCAGTGACTGAAAGACGCA     |
| IL-6-M-R           | TGGGGGAGGATGTTTGGATG     |
| TNF $\alpha$ -M-F  | ATGGCCTCCCTCTCATCAGT     |
| TNF $\alpha$ -M-R  | TTTGCTACGACGTGGGCTAC     |
| CCL2-M-F           | TTAAAAACCTGGATCGGAACCAA  |
| CCL2-M-R           | GCATTAGCTTCAGATTTACGGGT  |
| CCL3-M-F           | CTCCCAGCCAGGTGTCATTTT    |
| CCL3-M-R           | CAGGCATTCAGTTCCAGGTCAG   |
| CCL4-M-F           | GCTGCTTTGCCTACCTCTCC     |
| CCL4-M-R           | TCGAGTGACAAACACGACTGC    |
| CCL5-M-F           | TTTGCCTACCTCTCCCTCG      |
| CCL5-M-R           | CGACTGCAAGATTGGAGCACT    |
| UBB-M-F            | TTCGGTCTGCATTCCCAGTG     |
| UBB-M-R            | AACTTAAATTGGGGCAAGTGGC   |
